# Supplementary material
Source: PubMed Central journal article supplement (PMC4157367)
Supplement: NIHMS473667-supplement-Supplemental_material.pdf [file NIHMS473667-supplement-Supplemental_material.pdf]

**Supplementary Information**

**Manuscript Title:**

**Effect of Dibenzopyrene Measurement on Assessing Air Quality and Cancer Risk in Beijing Air**

**Authors:**

Julie Layshock, Staci Massey Simonich and Kim Anderson

**Table of Contents:**

---

|                                                                        |          |
|------------------------------------------------------------------------|----------|
| <b>Table 1</b> PAH Analyte List.....                                   | <b>2</b> |
| <b>Table 2</b> Analyte Recovery from Standard Reference Materials..... | <b>3</b> |
| <b>Table 3</b> Comparison of MW 302 recovery of SRM 1649b.....         | <b>4</b> |
| <b>Table 4</b> Mean PAH Concentrations.....                            | <b>5</b> |
| <b>Table 5</b> PAH Diagnostic Ratios.....                              | <b>6</b> |
| <b>Table 6</b> Particulate Matter Mass and Statistics..                | <b>7</b> |
| <b>Figure 1</b> PAH to PM Correlations.....                            | <b>8</b> |
| <b>Table 7</b> Mean Meteorological Parameters.....                     | <b>9</b> |

**Table 1** PAH analyte list monitored by GC-MS with number of fused benzene rings, grouping designation, abbreviation and chemical formula. Carcinogenic PAHs included those determined as IARC class 1, 2A and 2B (carcinogenic, possible and probable human carcinogens)<sup>1</sup>.

| PAH                         | Ring # | Designation           | Abbreviation | Formula                          |
|-----------------------------|--------|-----------------------|--------------|----------------------------------|
| Naphthalene                 | 2      | Other Non-Substituted | NAP          | C <sub>10</sub> H <sub>8</sub>   |
| 2-Methylnaphthalene         | 2      | Alkylated PAH         | 1-mNAP       | C <sub>11</sub> H <sub>10</sub>  |
| 1-Methylnaphthalene         | 2      | Alkylated PAH         | 2-mNAP       | C <sub>11</sub> H <sub>10</sub>  |
| Naphthalene, 1,6-dimethyl-  | 2      | Alkylated PAH         | 1,6-dmNAP    | C <sub>12</sub> H <sub>12</sub>  |
| Acenaphthylene              | 3      | Other Non-Substituted | ACY          | C <sub>12</sub> H <sub>8</sub>   |
| Naphthalene, 1,2-dimethyl-  | 2      | Alkylated PAH         | 1,2-dmNAP    | C <sub>12</sub> H <sub>12</sub>  |
| Acenaphthene                | 3      | Other Non-Substituted | ACE          | C <sub>12</sub> H <sub>10</sub>  |
| Fluorene                    | 3      | Other Non-Substituted | FLU          | C <sub>13</sub> H <sub>10</sub>  |
| Dibenzothiophene            | 3      | Sulfur-PAH            | DBT          | C <sub>12</sub> H <sub>8</sub> S |
| Phenanthrene                | 3      | Other Non-Substituted | PHE          | C <sub>14</sub> H <sub>10</sub>  |
| Anthracene                  | 3      | Other Non-Substituted | ANT          | C <sub>14</sub> H <sub>10</sub>  |
| Fluoranthene                | 4      | Other Non-Substituted | FLA          | C <sub>16</sub> H <sub>10</sub>  |
| Pyrene                      | 4      | Other Non-Substituted | PYR          | C <sub>16</sub> H <sub>10</sub>  |
| Retene                      | 3      | Alkylated PAH         | RET          | C <sub>18</sub> H <sub>18</sub>  |
| 1-Methylpyrene              | 4      | Alkylated PAH         | 1-mPYR       | C <sub>17</sub> H <sub>12</sub>  |
| Benz(a)anthracene           | 4      | Carcinogenic          | BaA          | C <sub>18</sub> H <sub>12</sub>  |
| Chrysene                    | 4      | Carcinogenic          | CHR          | C <sub>18</sub> H <sub>12</sub>  |
| Chrysene, 6-methyl-         | 4      | Alkylated PAH         | 6-mCHR       | C <sub>19</sub> H <sub>14</sub>  |
| Benzo(b)fluoranthene        | 5      | Carcinogenic          | BbF          | C <sub>20</sub> H <sub>12</sub>  |
| Benzo(k)fluoranthene        | 5      | Carcinogenic          | BkF          | C <sub>20</sub> H <sub>12</sub>  |
| Benzo(a)pyrene              | 5      | Carcinogenic          | BaP          | C <sub>20</sub> H <sub>12</sub>  |
| Indeno(1,2,3-c,d)pyrene     | 6      | Carcinogenic          | IcdP         | C <sub>22</sub> H <sub>12</sub>  |
| Dibenz(a,h)anthracene       | 5      | Carcinogenic          | DahA         | C <sub>22</sub> H <sub>14</sub>  |
| Benzo(ghi)perylene          | 6      | Other Non-Substituted | BghiP        | C <sub>22</sub> H <sub>12</sub>  |
| Dibenzo(a,l)pyrene          | 6      | Carcinogenic          | D(a,l)P      | C <sub>24</sub> H <sub>14</sub>  |
| Dibenzo(a,e)pyrene          | 6      | Carcinogenic          | D(a,e)P      | C <sub>24</sub> H <sub>14</sub>  |
| Dibenzo(a,h)pyrene          | 6      | Carcinogenic          | D(a,h)P      | C <sub>24</sub> H <sub>14</sub>  |
| Dibenzo(a,i)pyrene          | 6      | Carcinogenic          | D(a,i)P      | C <sub>24</sub> H <sub>14</sub>  |
| Dibenzo(a,e)fluoranthene*   | 6      | Other Non-Substituted | D(a,e)F      | C <sub>24</sub> H <sub>14</sub>  |
| Dibenzo(j,l)fluoranthene*   | 6      | Other Non-Substituted | D(j,l)F      | C <sub>24</sub> H <sub>14</sub>  |
| Dibenzo(b,k)fluoranthene*   | 6      | Other Non-Substituted | D(b,k)F      | C <sub>24</sub> H <sub>14</sub>  |
| Naphtho[2,3-b]fluoranthene* | 6      | Other Non-Substituted | N[2,3-b]F    | C <sub>24</sub> H <sub>14</sub>  |

\*Limited carcinogenicity information

#### References:

<sup>1</sup>IARC (1983,2008). Polynuclear Aromatic Compounds, Part 1 & Air Pollution, Part 1. Lyon, France. **32 and 92.**

**Table 2** PAHs recovered from National Institute of Standards and Technology (NIST) Standard Reference Materials (SRMs)<sup>2</sup>

| Analyte Recovery of NIST SRM 1649b: Urban Dust |                        |                        |              |     |
|------------------------------------------------|------------------------|------------------------|--------------|-----|
| N=6                                            | Certified Value        | AVG Measured           | AVG Recovery | RSD |
| Analyte                                        | (mg kg <sup>-1</sup> ) | (mg kg <sup>-1</sup> ) | (%)          | (%) |
| Phenanthrene                                   | 3.94                   | 3.55                   | 90.0         | 6   |
| Fluoranthene                                   | 6.14                   | 5.94                   | 96.7         | 5   |
| Pyrene                                         | 4.78                   | 4.73                   | 98.9         | 5   |
| Benz(a)anthracene                              | 2.09                   | 1.95                   | 93.3         | 10  |
| Chrysene                                       | 3.01                   | 2.76                   | 91.8         | 7   |
| Benzo(b)fluoranthene                           | 5.99                   | 6.54                   | 109.2        | 6   |
| Benzo(k)fluoranthene                           | 1.75                   | 1.85                   | 105.7        | 11  |
| Benzo(a)pyrene                                 | 2.47                   | 2.10                   | 85.1         | 7   |
| Indeno(1,2,3-c,d)pyrene                        | 2.96                   | 2.56                   | 86.5         | 3   |
| Dibenz(a,h)anthracene                          | 0.29                   | 0.54                   | 123.9        | 8   |
| Benzo(ghi)perylene                             | 3.94                   | 3.96                   | 100.5        | 6   |
| <sup>^</sup> Dibenzo(a,e)pyrene                | 0.54                   | 0.58                   | 109.5        | 6   |
| <sup>^</sup> Dibenzo(b,k)fluoranthene          | 0.66                   | 0.69                   | 104.7        | 5   |

  

| Analyte Recovery of NIST SRM 1491a: Methyl-Substituted Polycyclic Aromatic Hydrocarbons |                        |                        |              |     |
|-----------------------------------------------------------------------------------------|------------------------|------------------------|--------------|-----|
| N=3                                                                                     | Certified Value        | AVG Measured           | AVG Recovery | RSD |
| Analyte                                                                                 | (µg mL <sup>-1</sup> ) | (µg mL <sup>-1</sup> ) | (%)          | (%) |
| 2-Methylnaphthalene                                                                     | 1.76                   | 1.69                   | 96.3         | 5   |
| 1-Methylnaphthalene                                                                     | 1.52                   | 1.39                   | 91.2         | 3   |
| Naphthalene, 1,6-dimethyl-                                                              | 1.39                   | 1.26                   | 90.3         | 2   |
| Naphthalene, 1,2-dimethyl-                                                              | 1.72                   | 1.63                   | 94.5         | 1   |
| Retene                                                                                  | 1.80                   | 1.85                   | 102.8        | 0   |
| 1-Methylpyrene                                                                          | 0.94                   | 0.98                   | 104.3        | 3   |
| Chrysene, 6-methyl-                                                                     | 1.04                   | 1.01                   | 97.2         | 3   |

All samples were analyzed using the GC-MS procedure for the DB-5MS column described in the methods section

<sup>^</sup>Analyzed using a 60m DB-17MS column as described in the methods section

**References:**

<sup>2</sup>NIST, National Institute of Standards and Technology, Gaithersburg, MD, Certification of Analysis, 2009.

**Table 3.**

Mean Recoveries of Molecular Weight 302 isomers from Urban Dust SRM 1649b

| Number PAH                              | mg kg <sup>-1</sup> with St Dev |                                                       |                                       |
|-----------------------------------------|---------------------------------|-------------------------------------------------------|---------------------------------------|
|                                         | This study<br>N=6               | Bergvall et al 2008 <sup>17</sup><br>N=4 <sup>a</sup> | NIST <sup>16</sup><br>Certified Value |
| 1 Dibenzo(a,l)pyrene                    | 0.028 (0.004)                   | 0.019 (0.002)                                         | 0.054 (0.002) <sup>b</sup>            |
| 2 Dibenzo(a,e)pyrene                    | 0.589 (0.037)                   | 0.456 (0.036)                                         | 0.538 (0.025)                         |
| 3 Dibenzo(a,h)pyrene                    | 0.0442 (0.004)                  | 0.06 (0.007)                                          | na                                    |
| 4 Dibenzo(a,i)pyrene                    | 0.133 (0.018)                   | 0.149 (0.014)                                         | na                                    |
| 5 Dibenzo(j,l)fluoranthene              | 0.464 (0.066)                   | na                                                    | 0.356 (0.018) <sup>b</sup>            |
| 6 Dibenzo(b,k)fluoranthene <sup>c</sup> | 0.686 (0.034)                   | na                                                    | 0.655 (0.035)                         |
| 7 Naphtho[2,3-b]fluoranthene            | 0.153 (0.011)                   | na                                                    | 0.147 (0.011) <sup>b</sup>            |

na= not reported, <sup>a</sup>analyzed SRM1649a, <sup>b</sup>Reference Value, <sup>c</sup>Dibenzo(b,k)fluoranthene could not be separated from Dibenzo(a,e)fluoranthene in this study and it was not reported from Bergvall et al or NIST  
 This study and Bergvall et al utilized a 60m DB-17MS column with 0.15µm film thickness, and  
 NIST used a 60m DB-17MS with 0.25µm film thickness and a proprietary column

**Table 4**

| Season:<br>PAH (pg m <sup>-3</sup> air) | 24 h Mean Concentrations (St Dev) |                       |                   |                   |                       |                   |
|-----------------------------------------|-----------------------------------|-----------------------|-------------------|-------------------|-----------------------|-------------------|
|                                         | Summer                            |                       |                   | Winter            |                       |                   |
|                                         | PM <sub>7,2</sub>                 | PM <sub>1,5-7,2</sub> | PM <sub>1,5</sub> | PM <sub>7,2</sub> | PM <sub>1,5-7,2</sub> | PM <sub>1,5</sub> |
| <b>Carcinogenic*</b>                    |                                   |                       |                   |                   |                       |                   |
| <b>Benz(a)anthracene</b>                | 25.4 (5)                          | 53.4 (17)             | 634 (115)         | 333 (151)         | 2080 (1080)           | 17400 (9530)      |
| <b>Chrysene</b>                         | 48.2 (11)                         | 154 (66)              | 945 (190)         | 346 (170)         | 1960 (1170)           | 24500 (9800)      |
| <b>Benzo(b)fluoranthene</b>             | n/a                               | n/a                   | 3530 (1650)       | 308 (154)         | 2030 (1130)           | 35000 (13100)     |
| <b>Benzo(k)fluoranthene</b>             | n/a                               | n/a                   | 974 (357)         | 87.5 (43)         | 534 (278)             | 13200 (6170)      |
| <b>Benzo(a)pyrene</b>                   | nd                                | nd                    | 714 (75)          | 140 (70)          | 943 (509)             | 23500 (11200)     |
| <b>Indeno(1,2,3-c,d)pyrene</b>          | 39.3 (6)                          | 192 (51)              | 1920 (157)        | 164 (72)          | 836 (342)             | 8320 (2670)       |
| <b>Dibenz(a,h)anthracene</b>            | nd                                | nd                    | 354 (69)          | nd                | 278 (100)             | 3790 (1160)       |
| <b>Dibenzo(a,l)pyrene</b>               | nd                                | nd                    | 23 (14)           | nd                | 14 (4)                | 2869 (1200)       |
| <b>Dibenzo(a,e)pyrene</b>               | 7.8 (1)                           | 15 (7)                | 259 (39)          | 24 (10)           | 152 (73)              | 29300 (11800)     |
| <b>Dibenzo(a,h)pyrene</b>               | nd                                | nd                    | 15 (2)            | 8 (2)             | 36 (18)               | 6190 (2530)       |
| <b>Dibenzo(a,i)pyrene</b>               | nd                                | nd                    | 53 (18)           | 12 (4)            | 55 (23)               | 9930 (4450)       |
| <b>Alkylated</b>                        |                                   |                       |                   |                   |                       |                   |
| <b>2-Methylnaphthalene</b>              | nd                                | nd                    | 44.6 (5)          | 37.2 (24)         | 50.6 (19)             | 344 (89)          |
| <b>1-Methylnaphthalene</b>              | nd                                | nd                    | nd                | 24.7 (14)         | 39.5 (13)             | 325 (101)         |
| <b>Naphthalene, 1,6-dimethyl-</b>       | nd                                | nd                    | nd                | 22.9 (6)          | 45.4 (14)             | 391 (84)          |
| <b>Naphthalene, 1,2-dimethyl-</b>       | nd                                | nd                    | nd                | nd                | nd                    | nd                |
| <b>1-Methylpyrene</b>                   | nd                                | nd                    | 87.2 (20)         | 151 (22)          | 537 (245)             | 6150 (2310)       |
| <b>Chrysene, 6-methyl-</b>              | nd                                | nd                    | nd                | 47.7 (15)         | 261 (85)              | 2560 (1000)       |
| <b>Retene</b>                           | 23.0 (8)                          | 39.1 (7)              | 124 (26)          | 645 (281)         | 2910 (1380)           | 30000 (14900)     |
| <b>Sulfur</b>                           |                                   |                       |                   |                   |                       |                   |
| <b>Dibenzothiophene</b>                 | nd                                | nd                    | nd                | 121 (36)          | 364 (183)             | 3590 (1460)       |
| <b>Non-Substituted</b>                  |                                   |                       |                   |                   |                       |                   |
| <b>Acenaphthylene</b>                   | nd                                | nd                    | 25.4 (4)          | 65.7 (23)         | 151 (63)              | 2140 (783)        |
| <b>Naphthalene</b>                      | 8.6 (3)                           | 13.0 (3)              | 37.1 (11)         | 70.9 (39)         | 88.9 (35)             | 288 (67)          |
| <b>Acenaphthene</b>                     | nd                                | nd                    | nd                | nd                | nd                    | nd                |
| <b>Fluorene</b>                         | nd                                | nd                    | 50.5 (8)          | 96.8 (54)         | 276 (137)             | 3300 (1190)       |
| <b>Phenanthrene</b>                     | 35.3 (6)                          | 85.7 (26)             | 430 (56)          | 786 (379)         | 3090 (1620)           | 37000 (15800)     |
| <b>Anthracene</b>                       | nd                                | 8.7 (1)               | 65.5 (20)         | 227 (133)         | 787 (449)             | 8030 (3190)       |
| <b>Fluoranthene</b>                     | 31.1 (11)                         | 118 (83)              | 606 (118)         | 856 (441)         | 4100 (2560)           | 38900 (16500)     |
| <b>Pyrene</b>                           | 41.6 (4)                          | 135 (49)              | 824 (116)         | 766 (346)         | 4100 (2170)           | 75400 (35300)     |
| <b>Benzo(ghi)perylene</b>               | 34.9 (5)                          | 152 (37)              | 2160 (195)        | 143 (63)          | 879 (432)             | 22500 (10400)     |
| <b>Dibenzo(j,l)fluoranthene</b>         | 7.6 (1)                           | 22 (6)                | 280 (29)          | 21 (9)            | 129 (65)              | 25050 (14100)     |
| <b>ΣDibenzo(b,k+a,e)fluoranthene</b>    | 9.8 (1)                           | 31 (11)               | 397 (45)          | 29 (13)           | 187 (92)              | 45600 (18600)     |
| <b>Naphtho[2,3-b]fluoranthene</b>       | nd                                | nd                    | 120 (21)          | 11 (7)            | 89 (46)               | 17950 (10200)     |
| <b>Σ PAHs pg m<sup>-3</sup></b>         | 292 (76)                          | 881 (493)             | 14600 (2870)      | 5340 (2450)       | 26700 (14000)         | 493000 (206000)   |

\*IARC Classified Carcinogens, IARC (1983,2008)<sup>14</sup>

**Bold represents the EPA 16 Priority Pollutant PAHs**

nd = not detected

n/a= data not available due to interfering compound for quantification

Summer (N=7) and winter (N=8) measured PAH concentrations (pg/m<sup>3</sup>) on three size fractions of airborne particulate matter: PM<sub>7,2</sub>, PM<sub>1,5-7,2</sub> and PM<sub>1,5</sub>. PAHs are organized by classification and normalized per cubic meter of air sampled.

**Table 5** PAH diagnostic ratios obtained from PM<sub>1.5</sub> with mean and 95% CI (in parentheses)

| Diagnostic Ratios for PM <sub>1.5</sub> (95% CI) |           |           |            |                 |                   |           |             |              |           |             |            |                                      |  |  |
|--------------------------------------------------|-----------|-----------|------------|-----------------|-------------------|-----------|-------------|--------------|-----------|-------------|------------|--------------------------------------|--|--|
| Ratio                                            | BaA/ CHR  | PYR/ BaP  | BghiP/ BaP | FLA/ (FLA+ PYR) | IPY/ (IPY+ BghiP) | BaA/ BaP  | IcdP/ BghiP | BbF/ D(a,l)P | BbF/ BkF  | BghiP/ IcdP | 1mPYR/ PYR | PM <sub>1.5</sub> / PM <sub>10</sub> |  |  |
| Summer                                           | 0.7 (0.2) | 1.2 (0.1) | 3.1 (0.4)  | 0.4 (0.1)       | 0.5 (0.0)         | 0.8 (0.2) | 0.9 (0.0)   | 4.4 (2.0)    | 3.8 (0.4) | 1.1 (0.1)   | 0.1 (0.0)  | 0.7 (0.0)                            |  |  |
| Winter                                           | 0.7 (0.2) | 3.2 (0.2) | 1.0 (0.1)  | 0.4 (0.0)       | 0.3 (0.1)         | 0.9 (0.2) | 0.5 (0.1)   | 6.5 (0.6)    | 3.0 (0.5) | 2.4 (0.5)   | 0.1 (0.0)  | 0.9 (0.0)                            |  |  |

$$PM_{10} = \Sigma PM_{1.5} \text{ and } PM_{1.5-7.2}$$

Taken alone, the use of PAH ratios to distinguish sources may be questionable since Beijing air is a myriad of emission sources, but they do provide a useful tool for comparison. An IPY/(IPY+BghiP) ratio of  $0.47 \pm 0.01$  (summer) and  $0.31 \pm 0.1$  (winter) is observed from this study. Zhou et al measured similar ratios, suggesting the lower wintertime ratio resulted from increased coal use in Beijing winters<sup>3</sup>. Diagnostic ratios are widely reported in air. Zhang et al concluded air to be the most stable sample media for PAH preservation of source ratios compared to other media<sup>4</sup>, however, caution should be used when assigning sources based on diagnostic ratios alone. For example, PYR/BaP ratios of 1.2 in the summer and 3.2 in the winter can be interpreted as indicative of different sources. On the other hand, the seasonal difference could result from a suite of other factors including increased emissions of PYR in the winter, increased temperature-facilitated partitioning to the particulate phase during the cold season, or ratio shifts could also be a product of greater photodecomposition of PYR during the summer. Furthermore, a few ratios were consistent between seasons: BaA/CHR of 0.7, FLA/(FLA+PYR) of 0.4 and 1mPYR/PYR of 0.1. Traditionally, IPY/(IPY+BghiP) ratios of 0.18, 0.37, and 0.56 have been used to characterize gasoline, diesel, and coal/coke emissions respectively<sup>5</sup>; a recent study characterizing the emissions from Chinese coals by industrial and residential combustion, report values of 0.50, 0.57 and 0.35 for industrial, residential, and coal briquette combustion respectively<sup>6</sup>.

PM Mass ratios (PM<sub>2.5</sub>/PM<sub>10</sub>) have been shown to reflect different sources. Typically higher ratios (>0.5) are indicative of anthropogenic over natural sources<sup>7</sup>. In this study PM<sub>1.5</sub>/PM<sub>10</sub> were 0.7 and 0.9 during the summer and winter respectively. The enrichment of smaller particles in the winter could indicate different or increased anthropogenic combustion sources. The mass ratio six years prior was reported much lower at 0.45-0.48 and 0.5-0.7 in summer and winter respectively<sup>8</sup>.

## References

- J. Zhou, Wang, T., Huang, Y., Mao, T., Zhong, N., Size distribution of polycyclic aromatic hydrocarbons in urban and suburban sites of Beijing, China *Chemosphere*, 2005, **61**, 792-799.
- Zhang, X. L.; Tao, S.; Liu, W. X.; Yang, Y.; Zuo, Q.; Liu, S. Z., Source diagnostics of polycyclic aromatic hydrocarbons based on species ratios: A multimedia approach. *Environmental Science & Technology* **2005**, *39*, (23), 9109-9114.
- Duan, J. C.; Bi, X. H.; Tan, J. H.; Sheng, G. Y.; Fu, J. M., Seasonal variation on size distribution and concentration of PAHs in Guangzhou city, China. *Chemosphere* **2007**, *67*, (3), 614-622.
- Zhang, Y. X.; Schauer, J. J.; Zhang, Y. H.; Zeng, L. M.; Wei, Y. J.; Liu, Y.; Shao, M., Characteristics of particulate carbon emissions from real-world Chinese coal combustion. *Environmental Science & Technology* **2008**, *42*, (14), 5068-5073.
- WHO, *WHO Air quality guidelines for particulate matter, ozone, nitrogen dioxide and sulfur dioxide*, World Health Organization, 2005.
- Y. L. Sun, G. S. Zhuang, W. Ying, L. H. Han, J. H. Guo, D. Mo, W. J. Zhang, Z. F. Wang and Z. P. Hao, *Atmospheric Environment*, 2004, **38**, 5991-6004.

**Table 6** Seasonal PM Mass and T tests

| 24 h Particulate Matter Mass Concentrations $\mu\text{g m}^{-3}$ |                   |      |         |                       |      |         |                    |         |                  |      |         |
|------------------------------------------------------------------|-------------------|------|---------|-----------------------|------|---------|--------------------|---------|------------------|------|---------|
| PM Mass                                                          | PM <sub>1.5</sub> |      |         | PM <sub>1.5-7.2</sub> |      |         | PM <sub>7.2*</sub> |         | PM <sub>10</sub> |      |         |
| <u>Season:</u>                                                   | Mean              | t    | p-value | Mean                  | t    | p-value | Median             | p-value | Mean             | t    | p-value |
| Summer                                                           | 163.4             | 0.75 | 0.47    | 57.7                  | 2.17 | 0.05    | 46.4               | 0.004   | 221.1            | 0.12 | 0.91    |
| Winter                                                           | 190.2             |      |         | 36.3                  |      |         | 23.5               |         | 226.4            |      |         |

p-value Student's T test or \*Mann-Whitney Rank Sum if normality failed,  $\text{PM}_{10} = \Sigma\text{PM}_{1.5} + \text{PM}_{1.5-7.2}$

Table shows no significant difference (p-value > 0.05) between summer (N=7) and winter (N=8) PM mass for PM<sub>1.5</sub> and PM<sub>10</sub>, but reflects a significant difference for PM<sub>1.5-7.2</sub> and PM<sub>7.2</sub>.

**Figure 1** Correlations of PAHs to PM according to PM Size Fraction

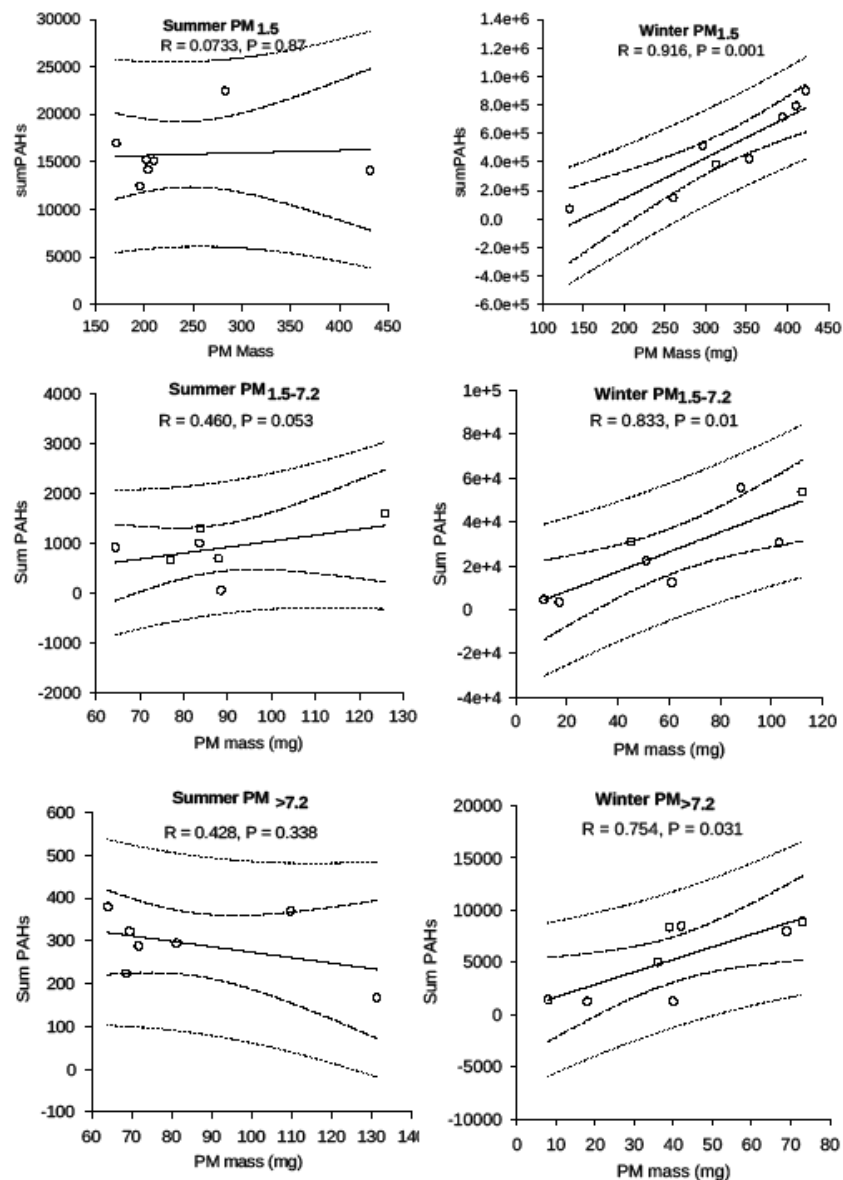

Linear regressions of the sum of PAHs ( $\mu\text{g m}^{-3}$ ) to PM mass per size fraction of PM (PM<sub>1.5</sub> (top), PM<sub>1.5-7.2</sub> (middle) and PM<sub>>7.2</sub> (bottom)) during both seasons. The solid line represents the regression line, while the inner and outer dash sets display the confidence and prediction intervals respectively. Correlations are considered significant if the p-value < 0.05.



**Table 7** Mean meteorological parameters (95%CI) obtained by NOAA ARL with GDAS1 archived data (<http://www.ready.noaa.gov/ready/amet.html>).

Mean Meteorological Conditions with 95% CI:

| Parameter | MSL Pressure |     | Temp 2M |     | Dew point |     | Temp 850mb |     | Thickness |     | Height |     | Wind Speed |     | Humidity |      | Precipitation |     |
|-----------|--------------|-----|---------|-----|-----------|-----|------------|-----|-----------|-----|--------|-----|------------|-----|----------|------|---------------|-----|
| Units     | HPA          |     | Deg C   |     | n/a       |     | Deg C      |     | n/a       |     | DM     |     | knots      |     | %        |      | mm            |     |
| Winter    | 1036.1       | (5) | -7.5    | (2) | -20.4     | (4) | -13.1      | (2) | 519.2     | (5) | 547.4  | (3) | 3.9        | (1) | 39.3     | (14) | 0.0           | (0) |
| Summer    | 1008.9       | (3) | 25.9    | (2) | 13.7      | (2) | 19.6       | (2) | 578.4     | (2) | 586.2  | (4) | 3.1        | (1) | 52.1     | (8)  | 0.0           | (0) |

Data was retrieved after converting sampling times into GMT for Beijing, China (lat 39.9, long 116.4). Data was collected by NOAA every 3 hours at 500mb, unless otherwise specified, and averaged for each 24 hour sample period. Values in the table represent the mean data over the sample period. It is noteworthy that a recent PM study from Beijing applied a humidity correction to PM mass measurement. Wang et al observed a large spread of relative humidity (40-90%)<sup>9</sup>, but humidity effects for this study are expected to be negligible since lower relative humidity was recorded and standard protocols for mass measurements were followed. For example, humidity was highest during summer, ranging from 42-65%. Corrections from Wang et al would result in 1 +/-3 µg/m<sup>3</sup> change in PM mass<sup>9</sup>.

**Reference:**

<sup>9</sup>W. T. Wang, T. Primbs, S. Tao and S. L. M. Simonich, *Environmental Science & Technology*, 2009, **43**, 5314-5320.
